# Supplementary material for: Direct ink writing of high-performance Bi2Te3-based thermoelectric materials using quasi-inorganic inks and interface engineering
Source: Royal Society of Chemistry journal article supplement (doi:10.1039/d2ta02289c), 2022-01-01
Supplement: d2ta02289c1.pdf [file d2ta02289c1.pdf]

## Supporting Information

### **Direct ink writing of high-performance Bi<sub>2</sub>Te<sub>3</sub>-based thermoelectric materials by quasi-inorganic inks and interface engineering**

*Zhengshang Wang<sup>a</sup>, Wen Cui<sup>a</sup>, Hao Yuan<sup>b</sup>, Xiaoli Kang<sup>b</sup>, Zhou Zheng<sup>b</sup>, Longqin*

*Chen<sup>c</sup>, Qiujun Hu<sup>d</sup>, Wenbin Qiu<sup>c</sup>, Jun Tang<sup>c</sup>, Xudong Cui<sup>b,\*</sup>*

<sup>a</sup> Sichuan Research Center of New Materials, 596 Yinhe Road, Shuangliu, Chengdu 610200, PR China

<sup>b</sup> Institute of Chemical Materials, China Academy of Engineering Physics, Mianyang 621900, PR China

<sup>c</sup> Key Laboratory of Radiation Physics and Technology of Ministry of Education, Institute of Nuclear Science and Technology, Sichuan University, Chengdu 610064, China

<sup>d</sup> College of Physics, Sichuan University, Chengdu 610065, China

\* Corresponding authors.

*E-mail addresses:* [xudcui@caep.cn](mailto:xudcui@caep.cn)

In order to gain more insights into the thermal properties of the as-printed samples, we calculated the thermal conductivity according to the relationship:

$$\kappa_{tot} = \kappa_{ele} + \kappa_{lat} + \kappa_b \quad \text{\textyen* MERGEFORMAT (1)}$$

where  $\kappa_{tot}$  is the total thermal conductivities,  $\kappa_{lat}$  is the lattice thermal conductivities,  $\kappa_b$  is the bipolar thermal conductivities,  $\kappa_{ele}$  is the electrical thermal conductivities, respectively. Besides,  $\kappa_{ele}$  can be estimated by Wiedemann–Franz law  $\kappa_{ele} = L\sigma T$ , as shown in Fig. S7a and S7d.

Since lattice vibration dominate the phonon scattering process above Debye temperature, temperature-dependent  $\kappa_{lat}$  can be extrapolated by the following expression [1, 2]:

$$\kappa_{lat} = A + B \cdot T^{-1} \quad \text{\textyen* MERGEFORMAT (2)}$$

where  $A$  and  $B$  are the fitting parameters. We can achieve the fitted values of  $A$  and  $B$ , according to the experimental results of  $\kappa_{lat} + \kappa_b$  and the calculated ones, before  $\kappa_{lat} + \kappa_b$  are governed by  $\kappa_b$ . Then, we could extrapolate the values of  $\kappa_{lat}$  at relatively high temperature, based on the above expressions. Finally,  $\kappa_b$  can be obtained through subtracting the calculated  $\kappa_{lat}$  from  $\kappa_{lat} + \kappa_b$  (Fig. S7c and S7f).

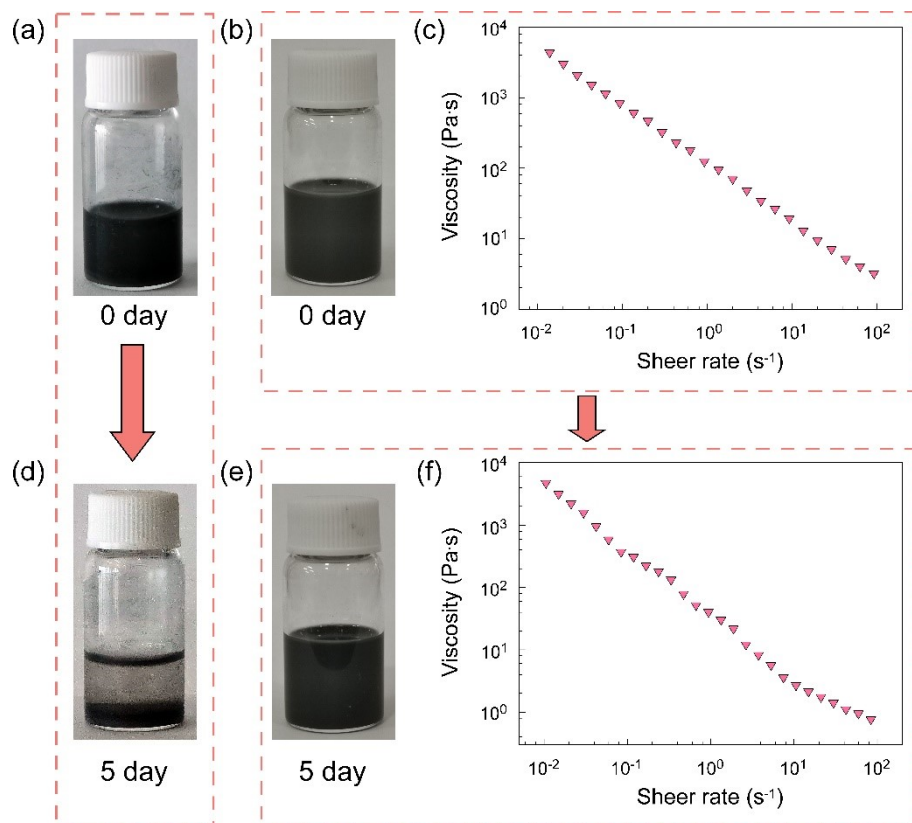

**Fig. S1.** Stability of  $\text{Bi}_2\text{Te}_3$ -based TE inks. Photographs of inks without (a) and with (b) PAA-PEI binders. (c) Complex viscosity corresponding to TE inks with binders (b). Photographs of inks after 5-days-settlement without (d) and with (e) PAA-PEI binders. (f) Complex viscosity corresponding to TE inks with binders (e).

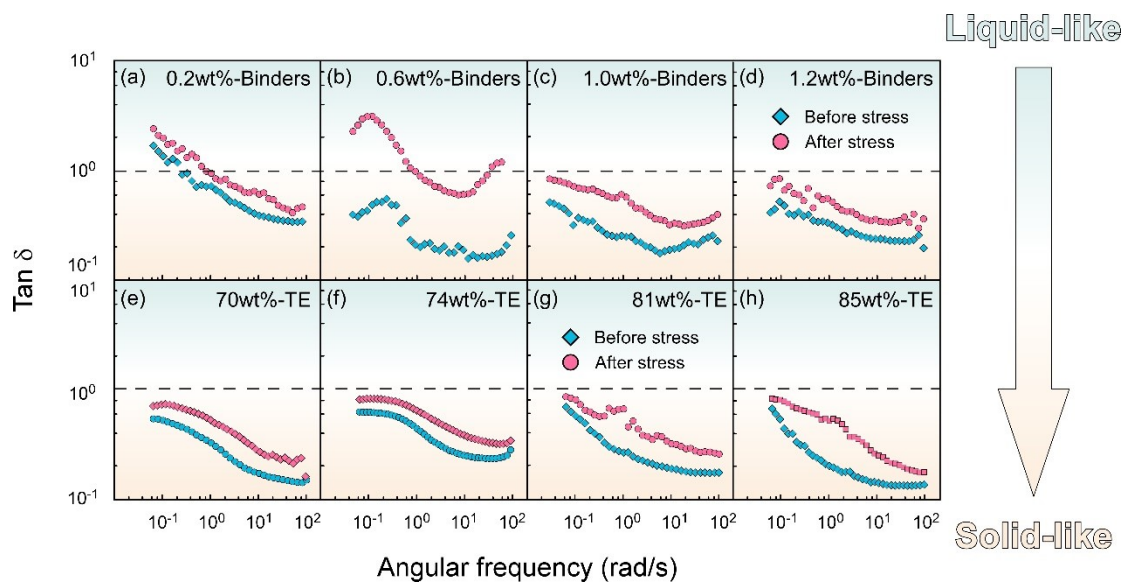

**Fig. S2.** Loss tangent  $\tan\delta$  curves of TE inks containing 81wt% particles loading with different binders content (a) 0.2wt%, (b) 0.6wt%, (c) 1.0wt%, (d) 1.2wt%. Loss tangent  $\tan\delta$  curves of TE inks containing 1.0wt% binders with various particles loading (e) 70wt%, (f) 74wt%, (g) 81wt%, (h) 85wt%.

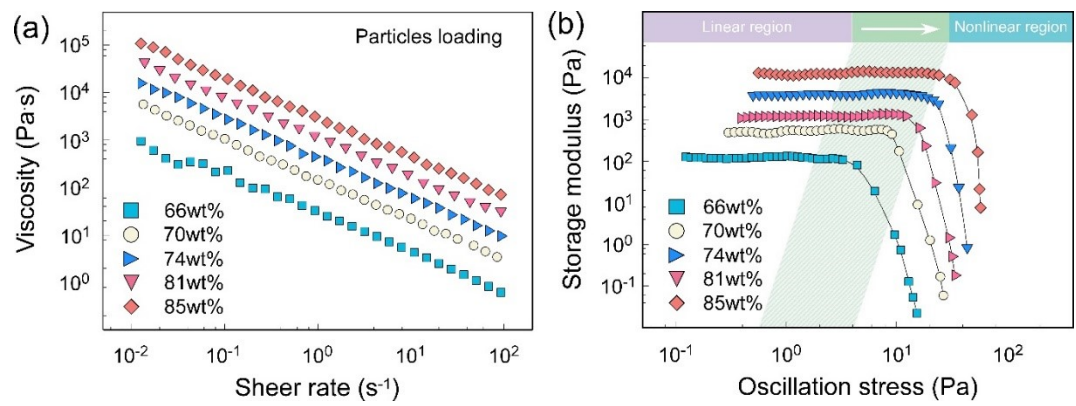

**Fig. S3.** (a) Complex viscosity and (b) storage modulus curves of 1.0wt% binders TE inks with various particle loadings.

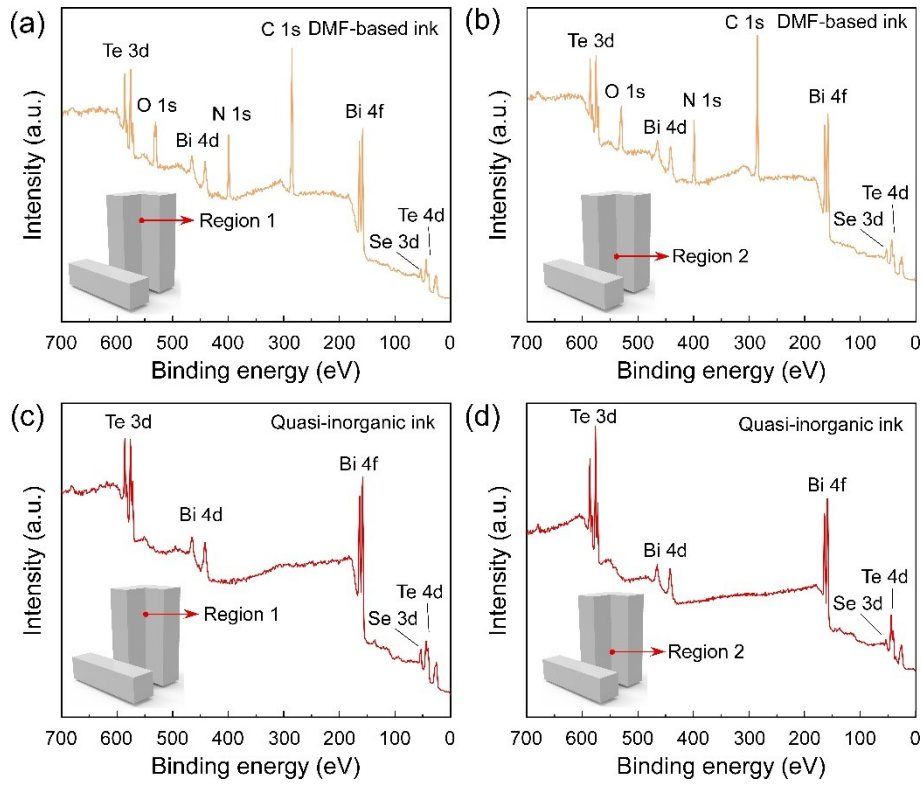

**Fig. S4.** XPS spectrums of (a) Region 1 and (b) Region 2 selected in *n*-type sample printed by DMF-based inks. XPS spectrums of (c) Region 1 and (d) Region 2 selected in *n*-type sample printed by quai-inorganic inks. The above peaks are indexed to Te 3d, Te 4d, Bi 4d, Bi 4f, Se 3d, C 1s, O 1s, and N 1s, respectively [3, 4].

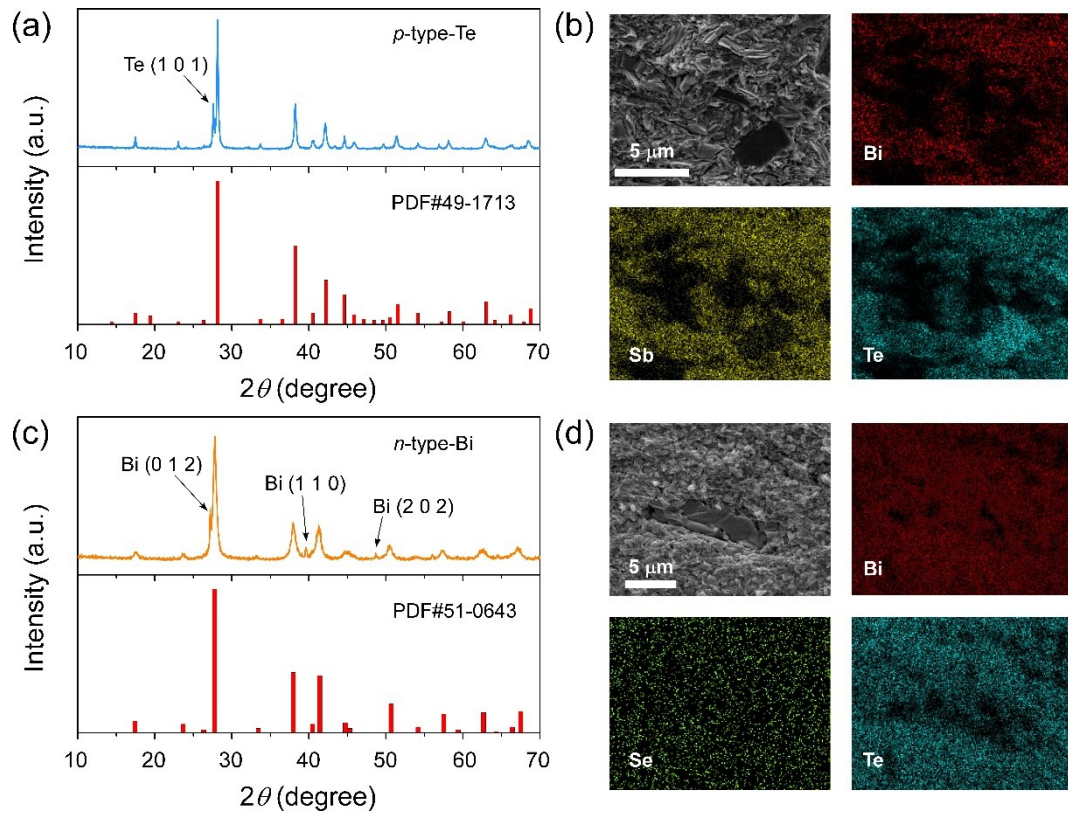

**Fig. S5.** (a) XRD patterns for 3D-printed *p*-type-Te. (b) Fracture surface morphology and corresponding energy-dispersive spectroscopy (EDS) mapping for 3D-printed *p*-type-Te. (c) XRD patterns for 3D-printed *n*-type-Bi. (d) Fracture surface morphology and corresponding EDS mapping for 3D-printed *n*-type-Bi.

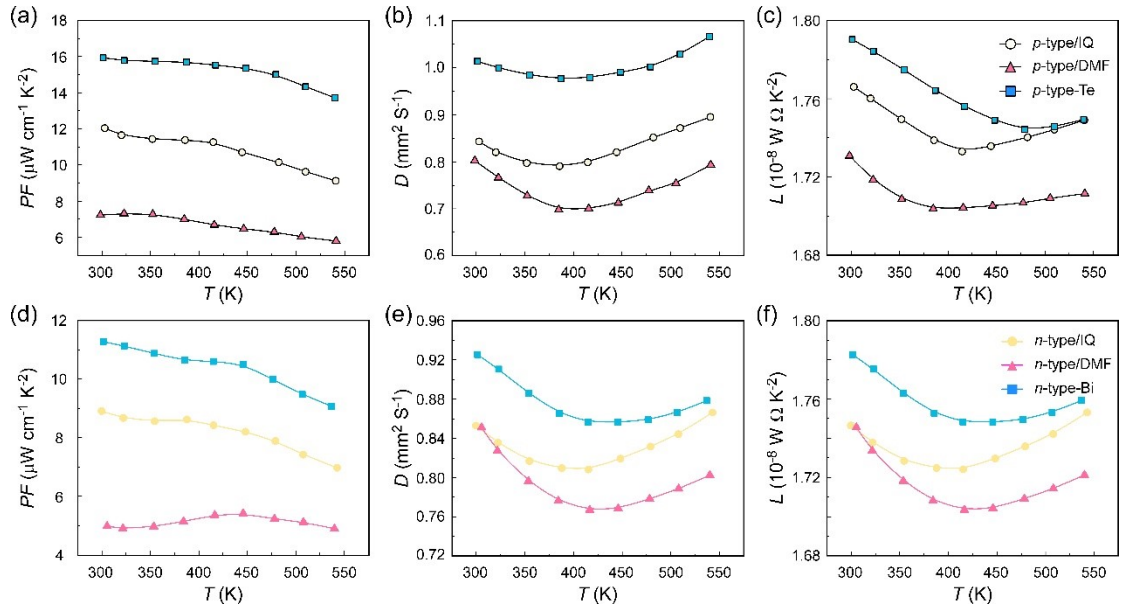

**Fig. S6.** Temperature-dependent (a) power factor  $PF$ , (b) thermal diffusivities  $D$ , (c) Lorenz numbers  $L$  of 3D-printed  $p$ -type samples. Temperature-dependent (d) power factor  $PF$ , (e) thermal diffusivities  $D$ , (f) Lorenz numbers  $L$  of 3D-printed  $n$ -type samples .



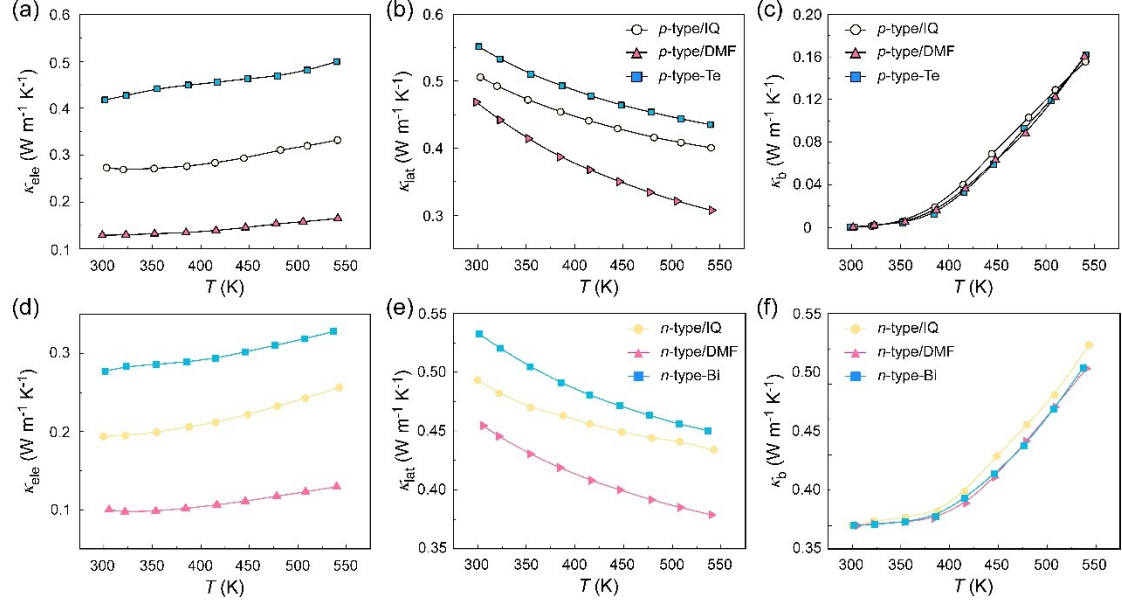

**Fig. S7.** Temperature-dependent (a) electrical thermal conductivities  $\kappa_{\text{ele}}$ , (b) lattice thermal conductivities  $\kappa_{\text{lat}}$ , (c) bipolar thermal conductivities  $\kappa_{\text{lat}}$  of 3D-printed  $p$ -type samples. Temperature-dependent (d) electrical thermal conductivities  $\kappa_{\text{ele}}$ , (e) lattice thermal conductivities  $\kappa_{\text{lat}}$ , (f) bipolar thermal conductivities  $\kappa_{\text{b}}$  of 3D-printed  $n$ -type samples. The calculation details of bipolar thermal conductivities  $\kappa_{\text{b}}$  had been reported in 3D-printed and bulk  $\text{Bi}_2\text{Te}_3$ -based materials [1].

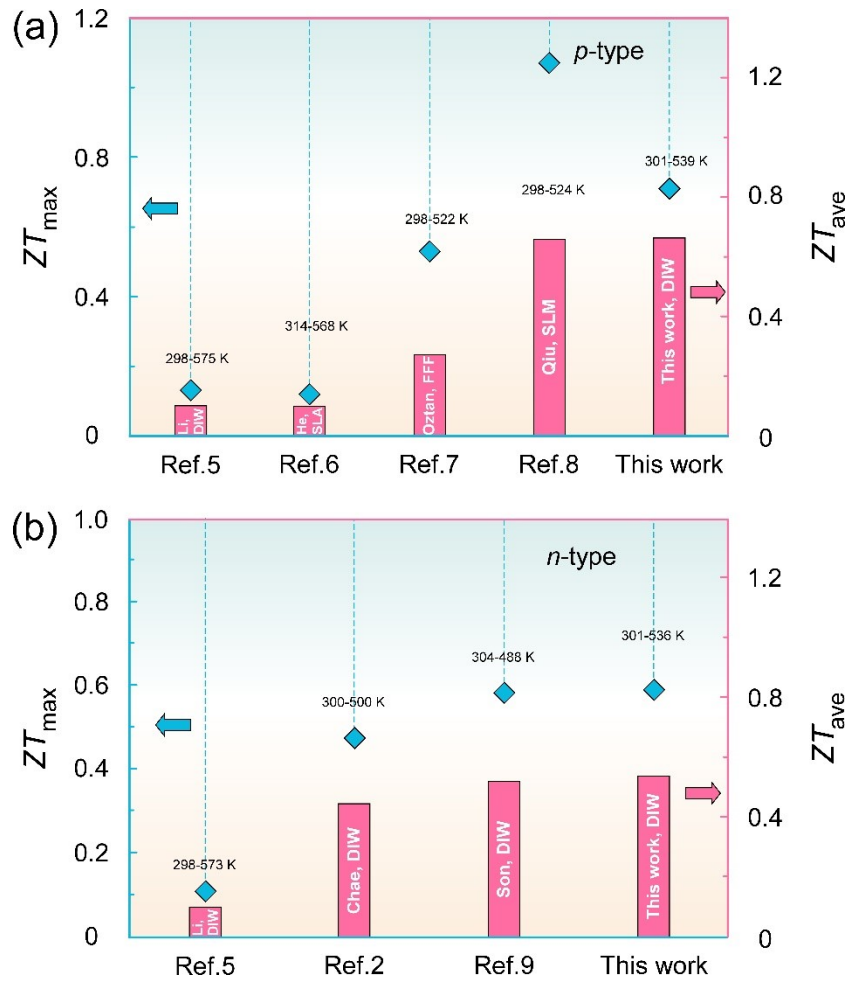

**Fig. S8.** Comparison of  $ZT$  maximum values ( $ZT_{max}$ ) and average  $ZT$  values ( $ZT_{ave}$ ) with previous reported (a)  $p$ -type [5-8], and (b)  $n$ -type [2, 5, 9] 3D-printed Bi<sub>2</sub>Te<sub>3</sub>-based thermoelectric materials fabricated by DIW, sterolithography apparatus (SLA), fused filament fabrication (FFF), and selective laser melting (SLM).

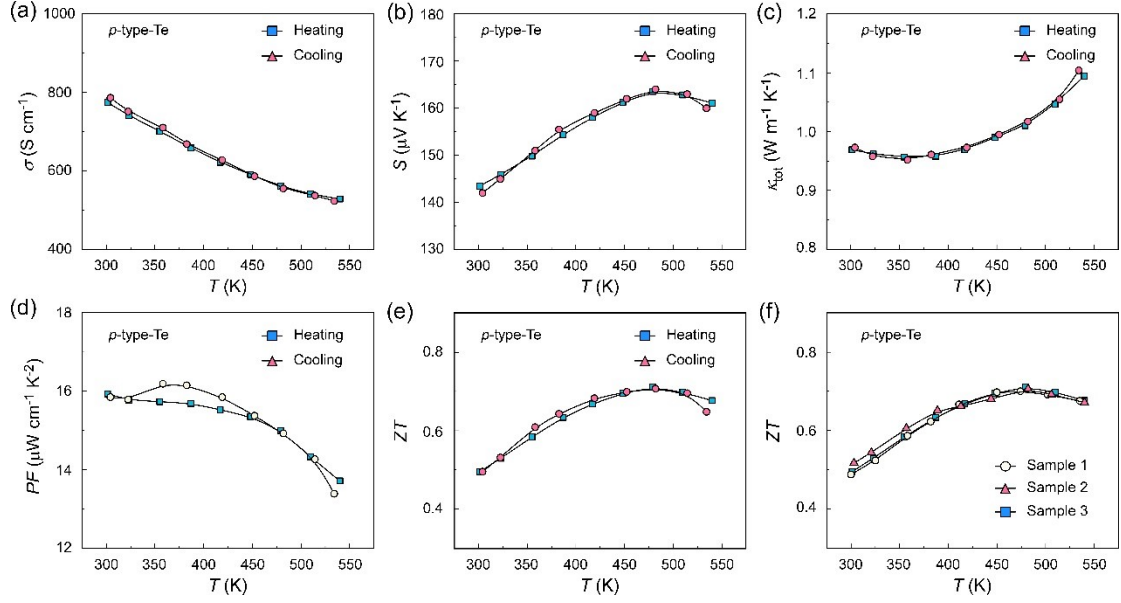

**Fig. S9.** Stability evaluation of the high-performance 3D-printed *p*-type-Te samples from heating to cooling cycles. (a) Electrical conductivity  $\sigma$ ; (b) Seebeck coefficient  $S$ ; (c) total thermal conductivity  $\kappa_{\text{tot}}$ ; (d) power factor  $PF$ ; (e)  $ZT$  values; (f) reproducibility of  $ZT$  values for three different *p*-type-Te samples printed independently.

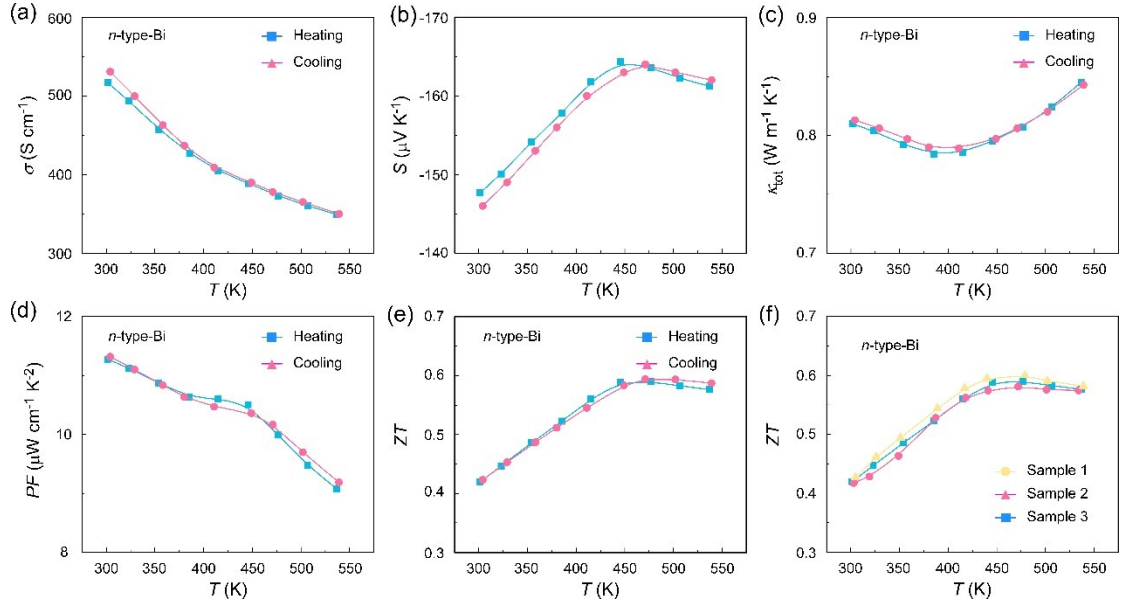

**Fig. S10.** Stability evaluation of the high-performance 3D-printed *n*-type-Bi samples from heating to cooling cycles. (a) Electrical conductivity  $\sigma$ ; (b) Seebeck coefficient  $S$ ; (c) total thermal conductivity  $\kappa_{\text{tot}}$ ; (d) power factor  $PF$ ; (e)  $ZT$  values; (f) reproducibility of  $ZT$  values for three different *n*-type-Bi samples printed independently.

Table S1. The calculated particle loading of TE inks, density, and relative density of *p*-type/IQ, *n*-type/IQ, *p*-type/DMF, *n*-type/DMF, *p*-type/Te, *n*-type/Bi.

|                    | Particle loading | Density (g/cm <sup>3</sup> ) | Relative density |
|--------------------|------------------|------------------------------|------------------|
| <i>p</i> -type/IQ  | 65.5wt%          | 2.44                         | 35.9%            |
|                    | 70.4wt%          | 2.86                         | 42.1%            |
|                    | 74.0wt%          | 3.70                         | 54.4%            |
|                    | 81.1wt%          | 5.21                         | 76.6%            |
|                    | 85.1wt%          | 5.42                         | 79.7%            |
| <i>n</i> -type/IQ  | 65.5wt%          | 2.36                         | 30.7%            |
|                    | 70.4wt%          | 2.98                         | 38.7%            |
|                    | 74.0wt%          | 3.57                         | 46.4%            |
|                    | 81.1wt%          | 4.92                         | 63.9%            |
|                    | 85.1wt%          | 5.08                         | 66.1%            |
| <i>p</i> -type/DMF | 81.1wt%          | 4.37                         | 64.2%            |
| <i>n</i> -type/DMF | 81.1wt%          | 4.11                         | 53.4%            |
| <i>p</i> -type/Te  | 81.1wt%          | 5.61                         | 82.5%            |
| <i>n</i> -type/Bi  | 81.1wt%          | 5.52                         | 71.8%            |

Table S2. The output performance of the TE devices.

| Materials                    | <i>p</i> : segmented BiSbTe | <i>p</i> : Bi <sub>0.5</sub> Sb <sub>1.5</sub> Te <sub>3</sub> | <i>p</i> : Bi <sub>0.4</sub> Sb <sub>1.6</sub> Te <sub>3</sub> | <i>p</i> : Bi <sub>0.5</sub> Sb <sub>1.5</sub> Te <sub>3.0</sub> |
|------------------------------|-----------------------------|----------------------------------------------------------------|----------------------------------------------------------------|------------------------------------------------------------------|
|                              |                             | <i>n</i> : Bi <sub>2</sub> Te <sub>3</sub>                     | <i>n</i> : Bi <sub>2</sub> Sb <sub>2.7</sub> Se <sub>0.3</sub> | <i>n</i> : Bi <sub>2.0</sub> Te <sub>2.7</sub> Se <sub>0.3</sub> |
| Device structure             | Tri-block                   | Annular                                                        | Half annular                                                   | Half annular                                                     |
| Method                       | DIW                         | DIW                                                            | DIW                                                            | DIW                                                              |
| Number of legs               | 1                           | 5                                                              | 3                                                              | 3                                                                |
| $\Delta T$ (K)               | 236.1                       | 54.6                                                           | 39.2                                                           | 55.6                                                             |
| $V_{OC}$ (mV)                | 53                          | 60.8                                                           | 27                                                             | 40.61                                                            |
| $V_{OC}$ per leg (mV)        | 53                          | 12.16                                                          | 9                                                              | 13.53                                                            |
| $P_{max}$ ( $\mu$ W)         | 260                         | 678                                                            | 1420                                                           | 380                                                              |
| $P_{max}$ per leg ( $\mu$ W) | 260                         | 135.6                                                          | 473.3                                                          | 126.6                                                            |
| Reference                    | [1]                         | [5]                                                            | [9]                                                            | This work                                                        |

## References

- [1] S. E. Yang, F. Kim, F. Ejaz, G. S. Lee, H. Ju, S. Choo, J. Lee, G. Kim, S.-h. Jung and S. Ahn, Composition-segmented BiSbTe thermoelectric generator fabricated by multimaterial 3D printing, *Nano Energy*, 81, (2021), 105638.
- [2] F. Kim, S. E. Yang, H. Ju, S. Choo, J. Lee, G. Kim, S.-h. Jung, S. Kim, C. Cha, K. T. Kim, S. Ahn, H. G. Chae and J. S. Son, Direct ink writing of three-dimensional thermoelectric microarchitectures, *Nature Electronics*, 4, (2021), 579-587.
- [3] C. R. Thomas, M. K. Vallon, M. G. Frith, H. Sezen, S. K. Kushwaha, R. J. Cava, J. Schwartz and S. L. Bernasek, Surface oxidation of  $\text{Bi}_2(\text{Te, Se})_3$  topological insulators depends on cleavage accuracy, *Chemistry of Materials*, 28, (2016), 35-39.
- [4] J.-D. Musah, A. Ilyas, A. Novitskii, I. Serhienko, K. O. Egbo, G. Saianand, V. Khovaylo, S. Kwofie, K. M. Yu and V. A. Roy, Effective decoupling of seebeck coefficient and the electrical conductivity through isovalent substitution of erbium in bismuth selenide thermoelectric material, *Journal of Alloys and Compounds*, 857, (2021), 157559.
- [5] N. Su, P. Zhu, Y. Pan, F. Li and B. Li, 3D-printing of shape-controllable thermoelectric devices with enhanced output performance, *Energy*, 195, (2020), 116892.
- [6] M. He, Y. Zhao, B. Wang, Q. Xi, J. Zhou and Z. Liang, 3D printing fabrication of amorphous thermoelectric materials with ultralow thermal conductivity, *Small*, 11, (2015), 5889-5894.

- [7] C. Oztan, S. Ballikaya, U. Ozgun, R. Karkkainen and E. Celik, Additive manufacturing of thermoelectric materials via fused filament fabrication, *Applied Materials Today*, 15, (2019), 77-82.
- [8] J. Qiu, Y. Yan, T. Luo, K. Tang, L. Yao, J. Zhang, M. Zhang, X. Su, G. Tan and H. Xie, 3D Printing of highly textured bulk thermoelectric materials: mechanically robust BiSbTe alloys with superior performance, *Energy & Environmental Science*, 12, (2019), 3106-3117.
- [9] F. Kim, B. Kwon, Y. Eom, J. E. Lee, S. Park, S. Jo, S. H. Park, B.-S. Kim, H. J. Im and M. H. Lee, 3D printing of shape-conformable thermoelectric materials using all-inorganic Bi<sub>2</sub>Te<sub>3</sub>-based inks, *Nature Energy*, 3, (2018), 301.
